RESEARCH ARTICLE

# Receptor binding and structural basis of raccoon dog ACE2 binding to SARS-CoV-2 prototype and its variants

Chunliang Luo<sup>1,2</sup>, Linjie Li<sup>2,3</sup>, Yuhang Gu<sup>2,4</sup>, Hangchuan Zhang<sup>1</sup>, Zepeng Xu<sup>2,5</sup>, Junqing Sun<sup>1</sup>, Kaiyuan Shi<sup>6</sup>, Sufang Ma<sup>2</sup>, Wen-Xia Tian<sup>1</sup>, Kefang Liu<sup>2,3\*</sup>, George F. Gao<sup>1,2,3\*</sup>

**1** College of Veterinary Medicine, Shanxi Agricultural University, Jinzhong, China, **2** CAS Key Laboratory of Pathogen Microbiology and Immunology, Institute of Microbiology, Chinese Academy of Sciences (CAS), Beijing, China, **3** Beijing Life Science Academy, Beijing, China, **4** School of Life Sciences, Yunnan University, Kunming, China, **5** Faculty of Health Sciences, University of Macau, Macau SAR, China, **6** Hubei Provincial Key Laboratory for Protection and Application of Special Plants in Wuling Area of China, College of Life Sciences, South-Central Minzu University, Wuhan, China

\* [liukf@im.ac.cn](mailto:liukf@im.ac.cn) (KL); [gaof@im.ac.cn](mailto:gaof@im.ac.cn) (GFG)

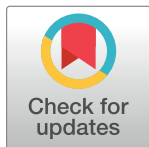

## OPEN ACCESS

**Citation:** Luo C, Li L, Gu Y, Zhang H, Xu Z, Sun J, et al. (2024) Receptor binding and structural basis of raccoon dog ACE2 binding to SARS-CoV-2 prototype and its variants. *PLoS Pathog* 20(12): e1012713. <https://doi.org/10.1371/journal.ppat.1012713>

**Editor:** Leo L. M. Poon, University of Hong Kong, HONG KONG

**Received:** June 27, 2024

**Accepted:** October 31, 2024

**Published:** December 5, 2024

**Copyright:** © 2024 Luo et al. This is an open access article distributed under the terms of the [Creative Commons Attribution License](https://creativecommons.org/licenses/by/4.0/), which permits unrestricted use, distribution, and reproduction in any medium, provided the original author and source are credited.

**Data Availability Statement:** The cryo-EM maps and the atomic structure coordinates have been deposited in the RCSB Protein Data Bank (PDB) and the Electron Microscopy Data Bank (EMDB) under accession codes 8YF2 / EMD-39208 (Cryo-EM structure of SARS-CoV-2 prototype RBD in complex with rdACE2 (local refinement)), EMD-39209 (Cryo-EM structure of SARS-CoV-2 prototype spike protein in complex with rdACE2), 8YFT / EMD-39229 (Cryo-EM structure of SARS-CoV-2 alpha variant spike protein in complex with rdACE2 (local refinement)), EMD-39224 (Cryo-EM

## Abstract

Raccoon dog was proposed as a potential host of SARS-CoV-2, but no evidence support such a notion. In our study, we investigated the binding affinities of raccoon dog ACE2 (rdACE2) to the spike (S) protein receptor binding domain (RBD) of SARS-CoV-2 prototype (PT) and its variants. It revealed that the binding affinities of RBD from SARS-CoV-2 variants were generally lower than that of the PT RBD. Through structural and functional analyses, we found amino acids H34 and M82 play pivotal roles in maintaining the binding affinity of ACE2 to different SARS-CoV-2 sub-variants. These results suggest that raccoon dogs exhibit lower susceptibility to SARS-CoV-2 compared to those animal species with a high prevalence of SARS-CoV-2 transmission.

## Author summary

In our study, we investigated the potential role of raccoon dogs as hosts for SARS-CoV-2 by examining the binding affinities between the spike (S) protein receptor binding domain (RBD) of SARS-CoV-2 prototype (PT) and its variants with the ACE2 receptor from raccoon dogs (rdACE2). Our findings revealed that the binding affinities of the RBD from most of SARS-CoV-2 variants to rdACE2 were generally lower compared to the PT RBD. Detailed structural and functional analyses identified two key amino acids, H34 and M82, which are crucial in preserving the binding affinity of ACE2 to different SARS-CoV-2 sub-variants. These results indicate that raccoon dogs have a lower susceptibility to SARS-CoV-2 compared to other animal species known for a high prevalence of SARS-CoV-2 transmission. This study provides valuable insights into the host range of SARS-CoV-2 and highlights the importance of specific amino acid residues in ACE2 for virus-receptor interactions. Understanding these interactions is essential for assessing the

map of SARS-CoV-2 alpha variant spike protein in complex with rdACE2).

**Funding:** This work was supported by the National Key R&D Program of China (2022YFF1203203). KL was supported by Young Elite Scientists Sponsorship Program by CAST (2021QNRC001), fellowships from the China Postdoctoral Science Foundation (2022T150688) and the Postdoctoral Science Foundation of China (2021M700161). The funders had no role in study design, data collection and analysis, decision to publish, or preparation of the manuscript.

**Competing interests:** The authors have declared that no competing interests exist.

zoonotic potential of SARS-CoV-2 and implementing effective measures to prevent inter-species transmission of the virus.

## Introduction

To date, seven coronaviruses have been identified capable of infecting humans: hCoV-NL63, hCoV-229E, hCoV-OC43, hCoV-HKU1, SARS-CoV-1, MERS-CoV and SARS-CoV-2 [1–8]. Additionally, Hu-PDCoV and CCoV-HuPn-2018 have been found to cause sporadic infections in children [9, 10]. Almost all these coronaviruses originate from animals [11].

SARS-CoV-2 has been continuously evolving into new variants since its outbreak in the end of 2019 [12]. The World Health Organization (WHO) has identified five variants of concern (VOCs): Alpha, Beta, Gamma, Delta and Omicron. Moreover, Omicron is undergoing further evolution into multiple sub-variants with distinct characteristics [13–16]. In the early stages of the pandemic, our group discovered the virus entry receptor and assessed the receptor binding of SARS-CoV-2. We raised concerns about its broad interspecies binding spectrum and found that the Omicron variant further expanded the host range in subsequent studies [17–20]. Consequently, numerous animals have been reported to be naturally infected by SARS-CoV-2, totaling 45 species including pets, livestock, captive animals, and wildlife (<https://www.fao.org/animal-health/situation-updates/sars-cov-2-in-animals/en>).

Receptor binding plays a critical role in SARS-CoV-2 infection. The receptor binding domain (RBD) of the spike (S) protein binds to its host receptor, angiotensin-converting enzyme 2 (ACE2), facilitating virus entry [20]. The structures of SARS-CoV-2 and its variants binding to ACE2 receptors from humans, intermediate horseshoe bats, big-eared horseshoe bats, cats, dogs, horses, rabbits, white-tailed deer, mink, fox, hippopotami, minke whale and sea lion have been elucidated [17,20–30]. Additionally, the binding affinities of ACE2 receptors from intermediate horseshoe bats, white-tailed deer, fox, rabbits and hippopotami to various SARS-CoV-2 variants were assessed [22,23,26,27,29]. However, the origin of SARS-CoV-2 is yet under debate, and further investigation is needed to explore potential hosts.

During the SARS-CoV-1 pandemic, the virus was detected in raccoon dogs, suggesting their role as one of the hosts for SARS-CoV-1 [31]. With the emergence of the SARS-CoV-2 pandemic, raccoon dogs have become important suspected hosts [32]. Animal infection experiments have demonstrated that raccoon dogs typically display mild clinical signs, with viral replication and tissue lesions predominantly found in the nasal conchae [32]. After surveillance for SARS-CoV-2 was reported, some scientists suspected raccoon dog is the natural host of SARS-CoV-2 [33,34]. However, the environmental samples cannot sufficiently prove the evidence for animal infection. A study examining coronaviruses in wild animals during the early stages of the COVID-19 outbreak, including 15 raccoon dogs, did not detect SARS-CoV-2 [35]. Another research team collected blood, tissue and swab samples from 229 raccoons and 11 raccoon dogs in Germany between 2021 and 2022 [36]. Despite thorough analysis using both molecular biological and serological methods, no evidence of SARS-CoV-2 was found in these samples. Until now, there has been no evidence to suggest that raccoon dogs can naturally become infected with SARS-CoV-2.

Recently, the structure of chimeric SARS-CoV-2 RBD (containing the core structure from SARS-CoV-1 and receptor-binding motif (RBM) from SARS-CoV-2) with a chimeric raccoon dog ACE2 (rdACE2) (containing the core structure from human ACE2 (hACE2) and virus-binding motif (VBM) from rdACE2) was determined [37]. However, it's worth noting that this construct is an artificial creation and may not fully reflect real interactions. In structural

biology, it's considered a best practice to rely on the original amino acid sequences, as any mutations, whether located on the binding motif or not, can potentially impact functionality. For instance, the R346T substitution, located far from the RBM of SARS-CoV-2 RBD, was found to enhance ACE2 binding only when interacting with residue R493 but not Q493, which occurred through a mechanism involving long-range conformational changes [38,39].

Herein, we evaluated the binding affinities of rdACE2 with RBDs of SARS-CoV-2 PT and its variants. To elucidate the molecular basis of rdACE2 binding to SARS-CoV-2 PT and Alpha RBDs, respectively, we obtained cryo-EM rdACE2/S complex structures.

## Results

### The rdACE2 exhibits decreased binding affinities with most of the SARS-CoV-2 variants, except for Alpha and Delta

The full-length amino acid identity between rdACE2 and hACE2 is 83.88%. Compared to hACE2, there is a deletion at residue 21 in rdACE2. To allow for a more accurate comparison, we adjusted the numbering of amino acid sequence position of rdACE2 according to hACE2 (S1 Fig).

To evaluate the binding affinities of rdACE2 to RBD of SARS-CoV-2 and its variants (S2 Fig), surface plasmon resonance (SPR) experiments were conducted (Figs 1A and S3). The results indicate that PT, Alpha and Delta variants exhibit comparable binding affinities to rdACE2 (Fig 1A). On the other hand, Beta, Gamma and all the Omicron sub-variants (including BA.1, BA.2, BA.4/5, BQ.1, BQ.1.1, BF.7, XBB, XBB.1.5, XBB.1.16, EG.5, HV.1, BA.2.86 and JN.1) notably exhibit decreased binding affinities to rdACE2 (Fig 1A). Particularly, the binding affinities of rdACE2 to the BA.2 RBD decreased by more than 10-fold, while the affinity to the XBB RBD dropped by nearly 10-fold (Fig 1A).

To verify whether rdACE2 mediate SARS-CoV-2 VOCs entry, BHK-21 cells were transfected with plasmids containing enhanced green fluorescent protein (EGFP)-tagged rdACE2 and then infected by the vesicular stomatitis virus (VSV)-vectored pseudotyped viruses incorporating the S protein of SARS-CoV-2 VOCs. We found that all of the tested pseudotyped SARS-CoV-2, including PT, Omicron BA.1, BA.2, BA.4/5, BA.2.86 and JN.1, could invade into rdACE2-expressing BHK-21 cells (Fig 1B).

### The overall structures of rdACE2 in complex with PT and Alpha S proteins

The cryo-EM structures of rdACE2 bound to SARS-CoV-2 PT or Alpha S proteins were determined at 2.52 Å and 2.86 Å, respectively (S4 and S5 Figs and S1 Table). In the PT S/rdACE2 complex, one RBD of PT S was observed to interact with the peptidase domain (PD) of rdACE2, while the other two RBDs were in a downward conformation (Fig 2A). Similarly, in the Alpha S/rdACE2 complex, two RBDs were present, but only one up-RBD was observed to bind to rdACE2 (Fig 2C). To obtain a high-resolution view of the RBD/ACE2 interface, local refinement was performed, resulting in the determination of the PT RBD/rdACE2 and Alpha S RBD/rdACE2 structures at 2.64 Å and 3.16 Å, respectively (S1 Table). The density of the interacting residues was clearly observed (Figs 2A, 2C, S4 and S5). The overall structure of the PT RBD/rdACE2 complex exhibits significant divergence from that of the chimeric SARS-CoV-2 RBD/chimeric rdACE2 complex (PDB: 8VQR), with a root mean square deviation (RMSD) of 3.032 Å for all the Cα atoms (Fig 3A). Importantly, the chimeric rdACE2 is in a closed state, whereas both the crystal structure of hACE2 and the cryo-EM structure of rdACE2 determined by us are in an open state (Fig 3A) [20].

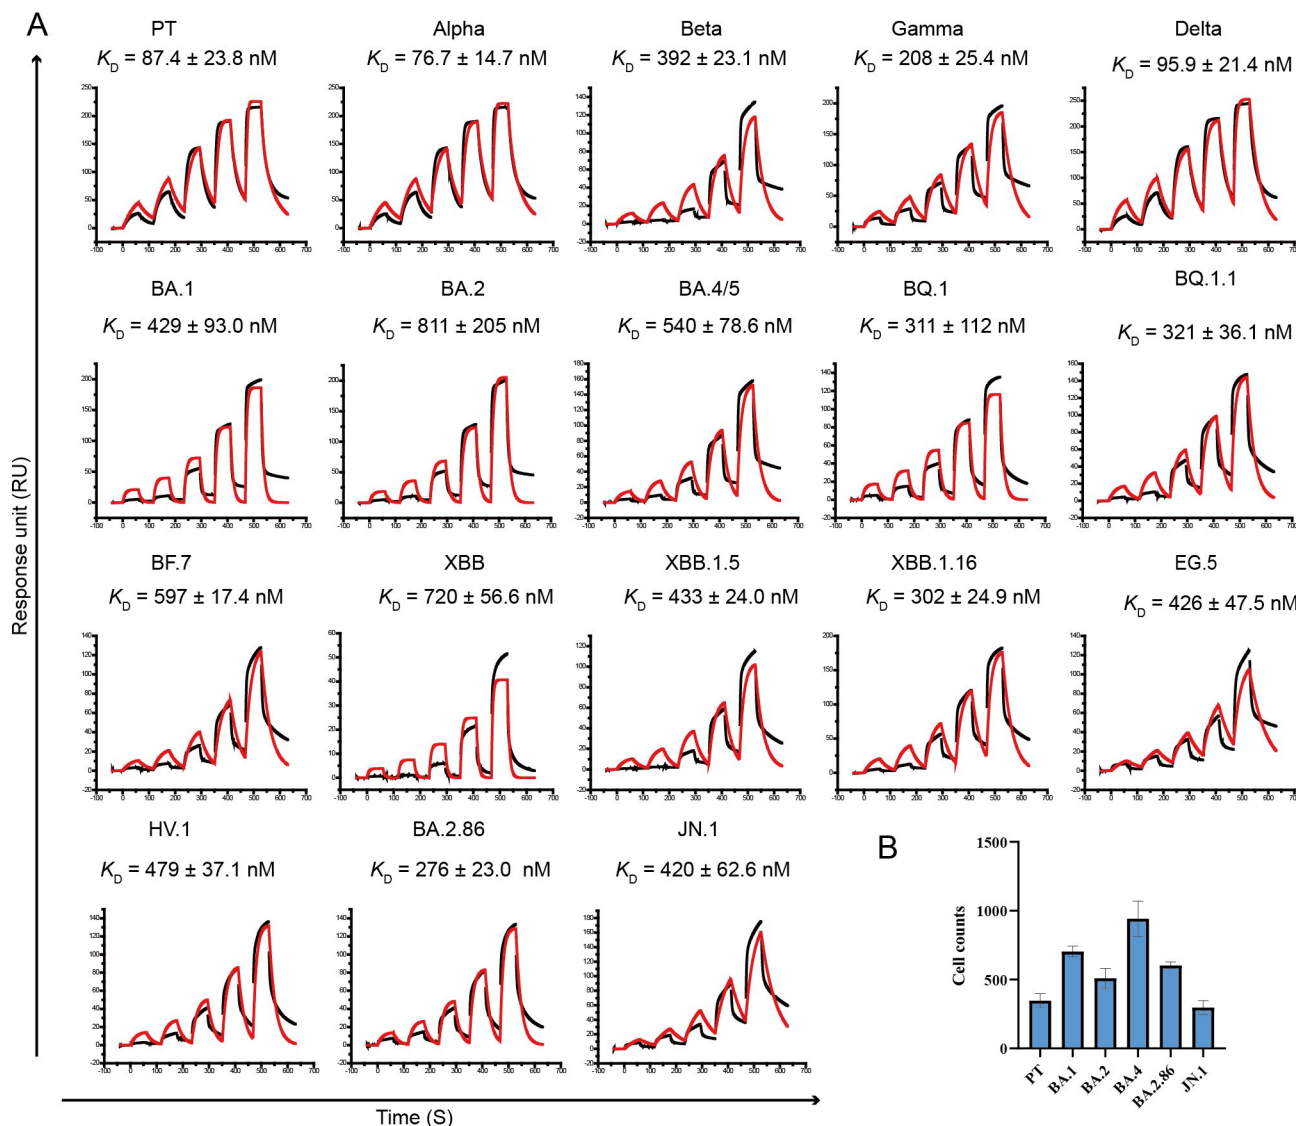

**Fig 1. SPR assays for the binding of rdACE2 to RBDs from different SARS-CoV-2 variants and the infectivity of pseudotyped SARS-CoV-2 in BHK-21 cells transient expression of rdACE2.** (A) Raw curves are represented by black lines, and fitted curves are represented by red lines. The dissociation constants ( $K_D$ ) are presented as mean  $\pm$  SD calculated from three independent experiments. (B) Transduction of the pseudotyped SARS-CoV-2 PT and VOCs in BHK-21 cells transient expression of rdACE2. The data represent the results of three replicates.

<https://doi.org/10.1371/journal.ppat.1012713.g001>

In the PD domain of hACE2, there are six N-linked glycosylation sites (N53, N90, N103, N322, N432 and N546). However, in the PD domain of rdACE2, N90, N103 and N432 are not part of the N-linked glycosylation motif sites. Instead, there are four additional N-linked glycosylation motifs in the rdACE2, including N134, N216 and N299 (Fig 3B–3D). Six N-linked glycosylation motifs are situated in the PD of rdACE2, with four of them observed in the structure, except for N134 and N546 (Fig 3C). Our previous study discovered that N-linked glycosylation of N90 in hACE2 forms an H-bond with T415 of the BA.2 RBD [39]. However, in rdACE2, this N-linked glycosylation motif is disrupted due to the N90D substitution (S1 Fig). In the chimeric rdACE2, the N-linked glycosylation sites are the same as those in hACE2, except for residue 90, which does not have an N-linked glycosylation motif (Fig 3D). Notably,



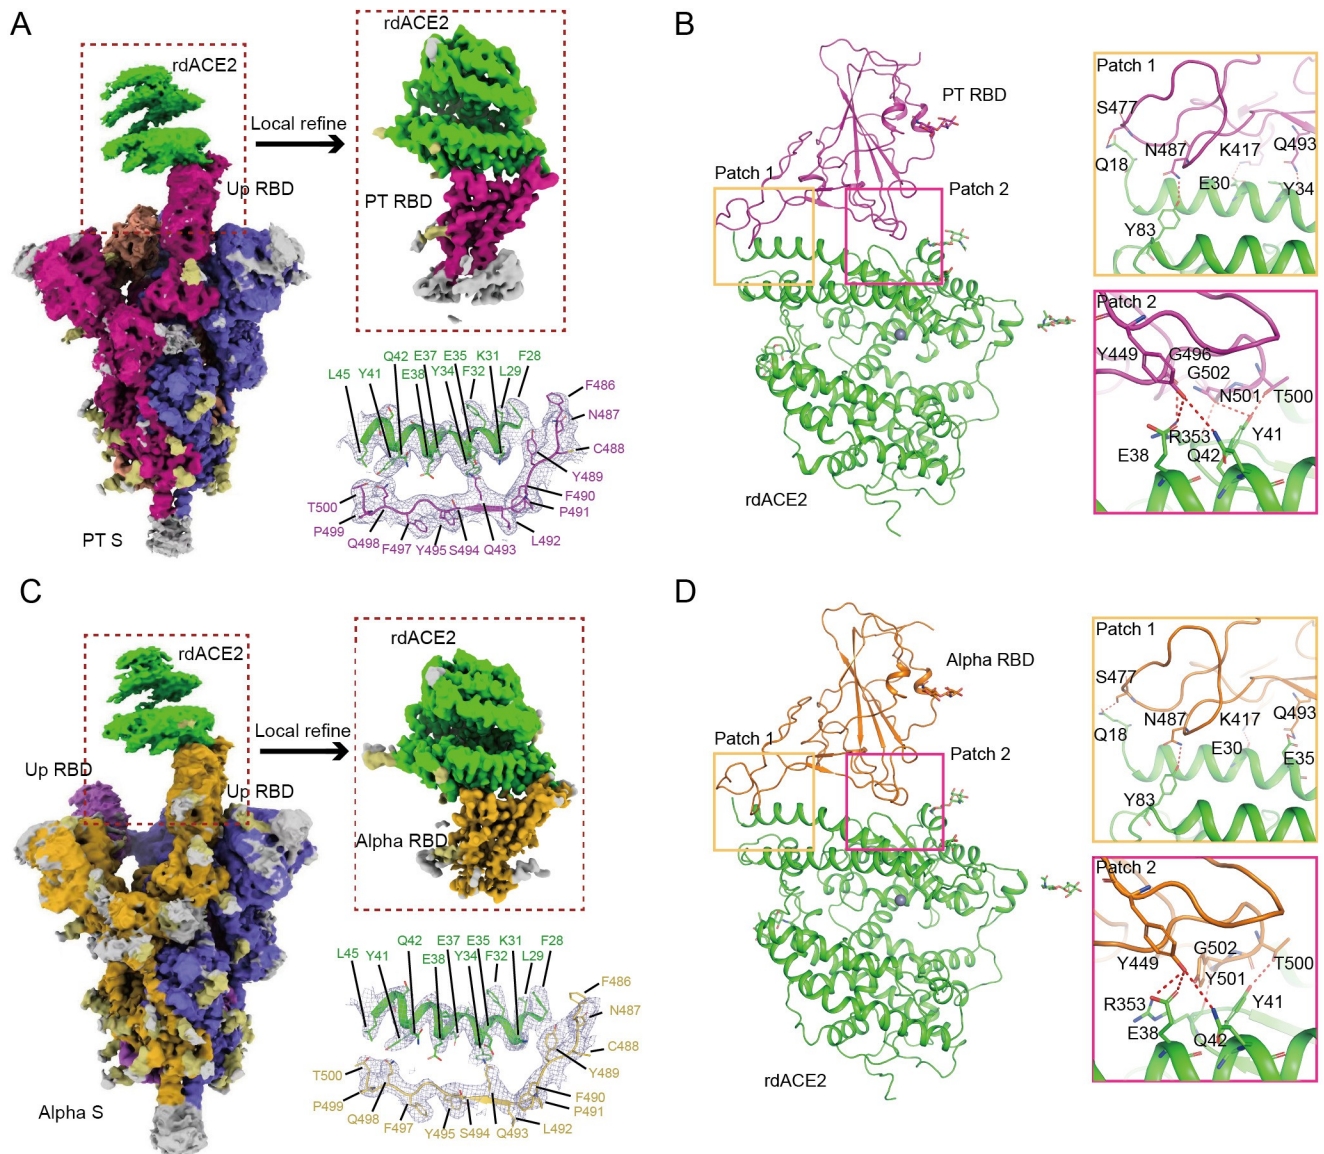

**Fig 2. The structures of SARS-CoV-2 PT and Alpha S protein in complex with rdACE2.** Cryo-EM density maps of the PT (A) and Alpha (C) S proteins bound to rdACE2 are depicted, with local refinement conducted on the binding interface of the S protein and rdACE2. The density maps illustrating the binding interface are presented as mesh, while the overall structures of rdACE2/PT RBD (B) and rdACE2/Alpha RBD (D) are represented as cartoons. Residues involved in the hydrogen bond networks of patch 1 and patch 2 are highlighted as sticks.

<https://doi.org/10.1371/journal.ppat.1012713.g002>

in the chimeric rdACE2, the glycosylation at N103 is inserted into the gap between  $\alpha 2$  and  $\alpha 4$ , whereas in hACE2, the glycosylation at N103 extends outward (Fig 3C and 3E).

As previously reported, the interacting residues of the RBD can be divided into two patches [28]. In patch 1 of both PT and Alpha RBD (Fig 2B and 2D and S2 Table), S477 and N487 form hydrogen bonds (H-bonds) with Q18 and Y83, respectively. K417 of RBD forms a salt bridge with E30 of rdACE2. In PT RBD, Q493 in patch 1 binds to Y34 of the rdACE2, whereas in Alpha RBD, Q493 forms an H-bond contact with E35. Moving to patch 2, T500 and N501 of both PT and Alpha RBD form H-bonds with Y41 of rdACE2, while G502 of these two RBDs forms an H-bond with R353 of rdACE2 (Fig 2B and 2D and S2 Table). Furthermore, in PT RBD, Y449 forms an H-bond contact with E38 and Q42 of rdACE2 (Fig 2B and S2 Table).

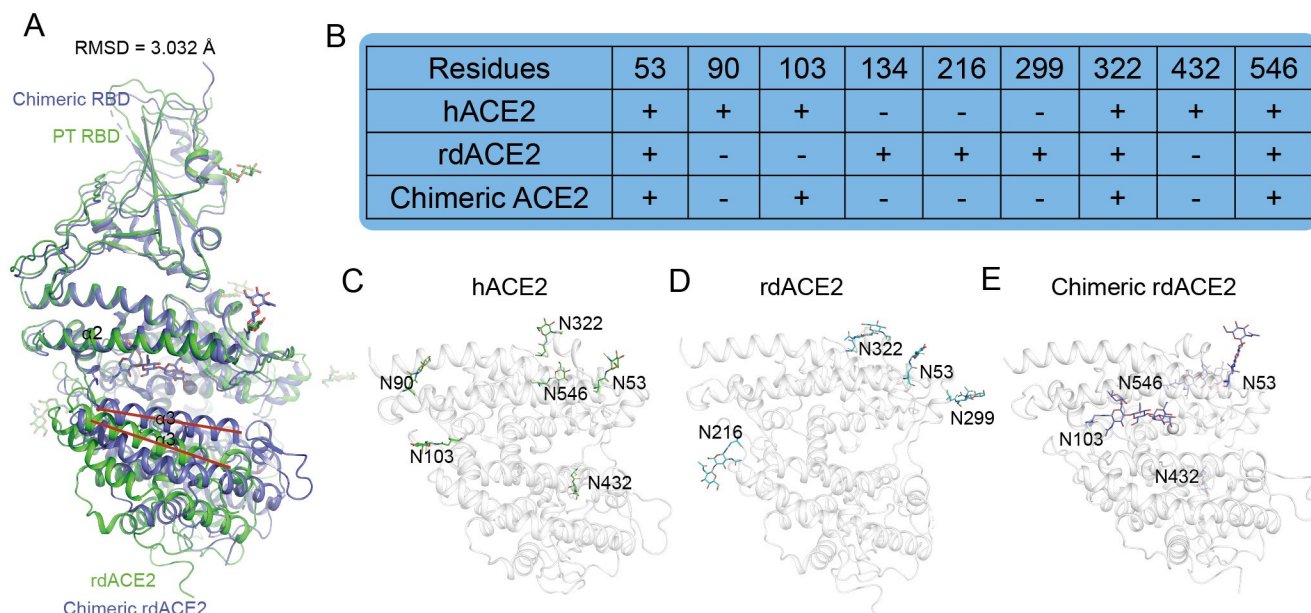

**Fig 3. Differential N-glycosylation between hACE2 and rdACE2.** (A) Superimposition of PT RBD/rdACE2 structure and chimeric RBD/chimeric rdACE2 structure (PDB:8VQR). (B) Statistical analysis of N-glycosylations in hACE2 and rdACE2. (C-E) N-glycosylation modifications observed in the structures of hACE2, rdACE2, and chimeric rdACE2, respectively.

<https://doi.org/10.1371/journal.ppat.1012713.g003>

Conversely, in Alpha RBD, Y449 forms an additional H-bond with R353 of rdACE2. Additionally, in PT RBD, G496 binds to E38 of rdACE2 via an H-bond (**Fig 2D** and **S2 Table**).

### Distinct binding sites between hACE2 and rdACE2

We conducted a comparison of the binding interfaces of hACE2 (PDB: 7SXY) and rdACE2 to PT RBD. Through this structural analysis, we observed that the binding interface of PT RBD/hACE2 is larger than that of PT RBD/rdACE2 (**Fig 4A–4D**). Specifically, residues Y473, G476, E484 and S494 of PT RBD were found to be involved in binding to hACE2 but not to rdACE2 (**Fig 4E**).

Furthermore, we identified six distinct binding residues on the ACE2 interface that differ between rdACE2 and hACE2: L24 (rdACE2)/Q24 (hACE2), E30/D30, Y34/H34, E38/D38, T82M and R353/K353 (**Fig 4F**). Additionally, residues Q18 and L45 of rdACE2 were found to participate in binding to PT RBD, whereas the corresponding residues of hACE2 do not contribute to binding (**Fig 4F**). Conversely, residues S19, E37, and N330 of hACE2 interact with PT RBD, whereas rdACE2 lacks these interactions (**Fig 4F**).

### The key residues for rdACE2 bound to SARS-CoV-2 RBD

To elucidate the molecular basis for the decreased affinity of rdACE2 for SARS-CoV-2 sub-variants, we constructed five rdACE2 mutants (L24Q, Y34H, E38D, T82M and R353K), substituting the corresponding residues with those of hACE2. Additionally, since N90-linked glycan of hACE2 has been observed to directly bind to BA.2, BA.2.86, and JN.1 RBDs, we created a rdACE2 D90N mutant.

We then tested the binding affinities of these mutants to the PT, Alpha and BA.2 RBDs, using hACE2 as a control (**S6 Fig**). Our results showed that the Y34H and T82M mutants of rdACE2 exhibited more than a 2-fold increase in binding affinity compared to wild-type



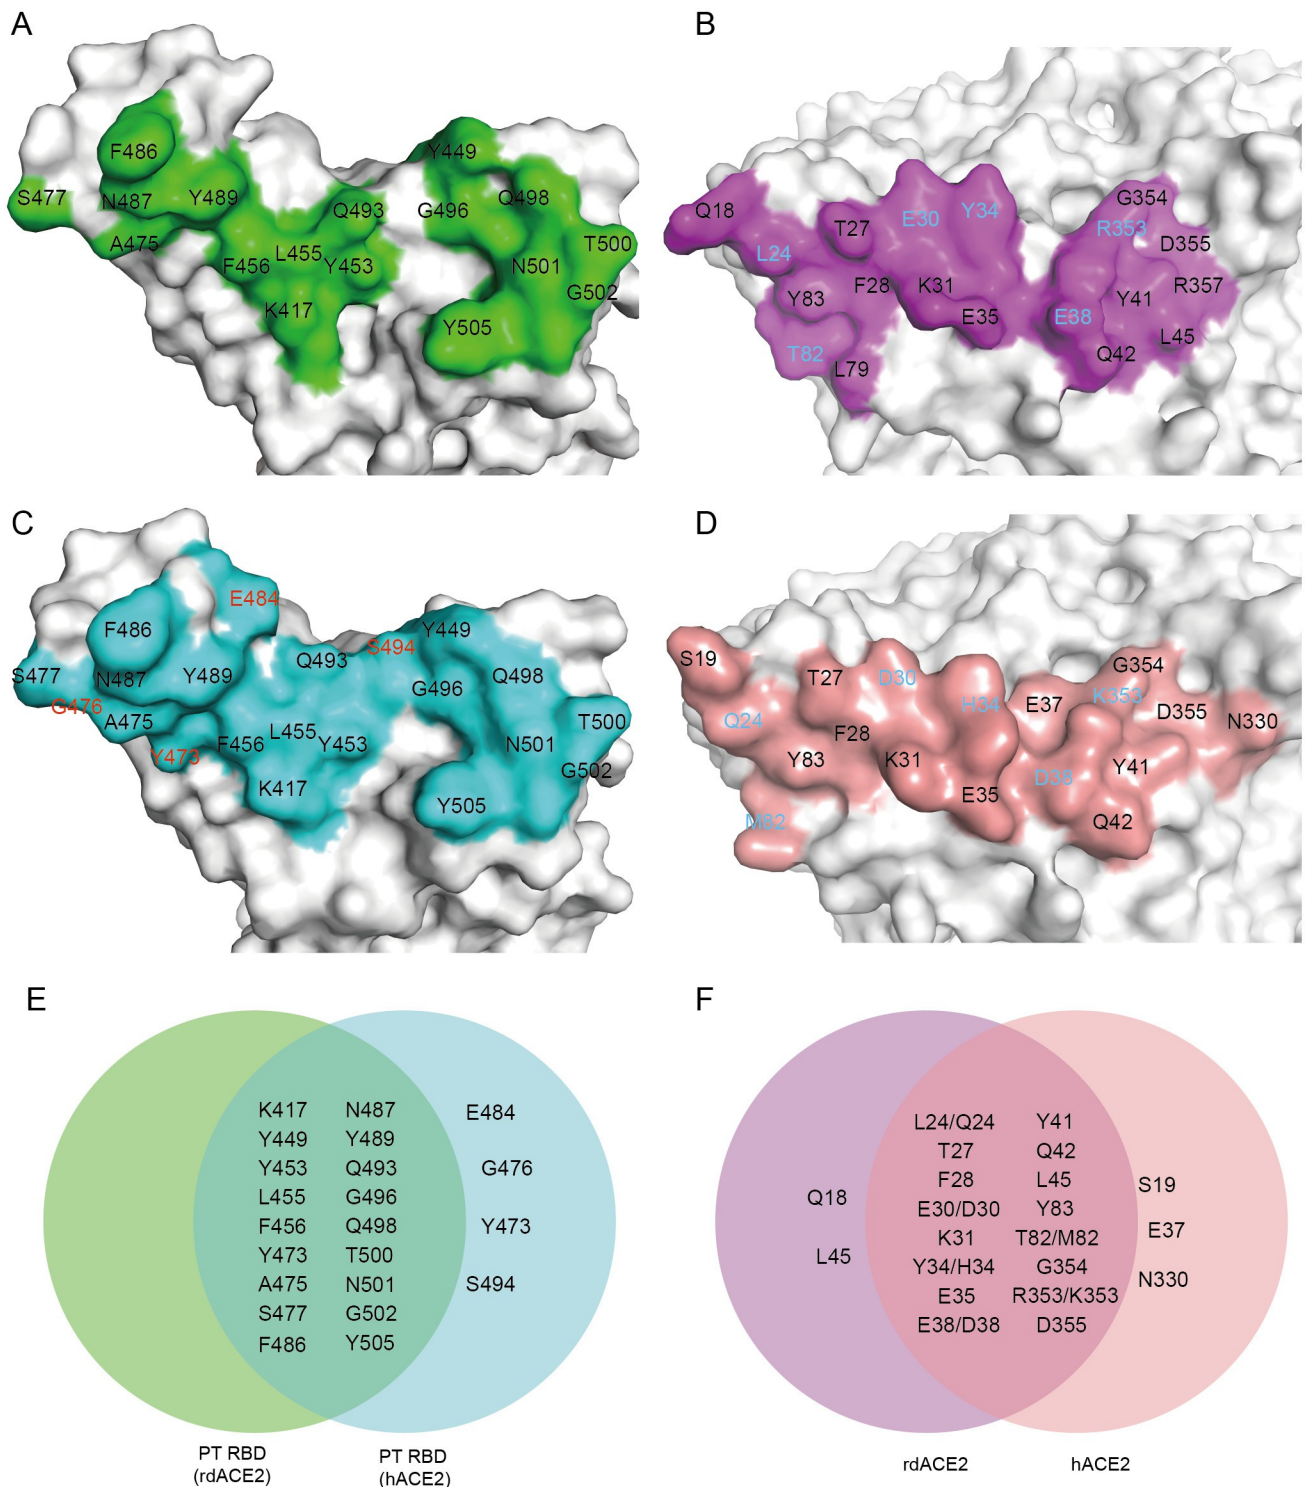

**Fig 4. Comparison of the binding interfaces between PT RBDs with hACE2 or rdACE2.** (A and B) The binding interfaces of PT RBD (A) and rdACE2 (B) in the rdACE2/PT RBD complex structure. (C and D) The binding interfaces of PT RBD (C) and hACE2 (D) in the hACE2/PT RBD complex structure. (E and F) Venn diagrams highlighting key residues at the binding interface. The red residues indicate those that interact with hACE2 but not with rdACE2. The cyan residues represent the distinct residues involved in PT RBD binding in both hACE2 and rdACE2.

<https://doi.org/10.1371/journal.ppat.1012713.g004>

rdACE2 across all tested RBDs (Fig 5A). Moreover, we found that the D90N mutant of rdACE2 decreased binding affinity for all tested RBDs (Fig 5A).

When comparing the Beta and Gamma RBDs with the Alpha RBD, Beta and Gamma variants possess two substitutions, K417N/T and E484K. Although the binding of E484 to hACE2 is weak, K417 forms an H-bond with E30 of hACE2. Therefore, we also tested the binding affinities of the PT RBD K417N variant to wild-type and mutant rdACE2 proteins. The binding affinity of PT RBD K417N to wild-type rdACE2 decreased by more than 6-fold than PT RBD, but it only decreased by less than 2-fold when binding to the rdACE2 Y34H and T82M mutants (Fig 5A).

From the structural analysis, we observed that in hACE2, H34 has two conformations, forming an H-bond with RBD S494 and engaging in Van der Waals' force (vdw) interaction with RBD Q493 (Fig 5B). Additionally, it can also form H-bonds with Q493 of RBDs from some SARS-CoV-2 sub-variants [38–41]. In rdACE2, the main chain of Y34 forms an H-bond with Q493 of RBD, but is far away from S494 of RBD (Fig 5B). Furthermore, in hACE2, F28, L79, M82 and Y83 create a hydrophobic environment; however, when M82 of ACE2 is substituted by T82, this hydrophobic environment is disrupted, leading to decreased binding affinity (Fig 5C). Moreover, RBD K417 forms an H-bond with E30 of rdACE2, but when it is mutated to RBD N417, the side chain becomes shorter and loses the H-bond contact (Fig 5D).

## Discussion

The evolution of SARS-CoV-2 is constrained by the trade-off between enhancing immune evasion and maintaining an optimal binding affinity to its host receptor [38,42]. Previous studies have shown that the affinities of SARS-CoV-2 and its variants to hACE2 are limited within a certain range [38]. Additionally, it has been observed that SARS-CoV-2 can naturally infect white-tailed deer, mink, hamster and hippopotamuses. Of particular concern is the broad spread of SARS-CoV-2 among white-tailed deer, hamster and mink, leading to the emergence of new variants. Similar to hACE2, the binding of SARS-CoV-2 and most of its variants to ACE2 receptors from white-tailed deer, mink and hamsters is also limited within a certain range (within two orders of magnitude in nanomolar) [23,25,27].

In this study, we investigated the binding affinities of RBDs from various SARS-CoV-2 variants to rdACE2 receptor. We found that these affinities were generally lower compared to the PT RBD, falling into the range of three digital numbers. Notably, animal infection assays revealed that raccoon dogs typically exhibit mild clinical signs when infected with the PT virus. The decreased binding affinities observed in SARS-CoV-2 variants may indicate a reduced ability to infect raccoon dogs effectively.

From our structural analysis, we discovered that the rdACE2 mutants Y34H and T82M significantly enhance the binding affinity to the PT, Alpha, and BA.2 RBDs. More notably, the K417N mutation in the PT RBD substantially diminishes its binding to rdACE2. However, when the rdACE2 undergoes mutations from Y34 to H34 or from T82 to M82, these two mutants exhibit comparable binding affinities to the PT RBD K417N as seen in the original rdACE2/PT RBD interaction. This finding indicates that these two residues play a pivotal role in maintaining the binding affinity of ACE2 to different SARS-CoV-2 sub-variants.

Although structures determined by cryo-EM and those determined by crystallography may differ in their interaction details [40], the substantial differences in ACE2 conformation could be related to the protein constructs used. Additionally, the N103 glycosylation was not observed to insert into the gap between  $\alpha 2$  and  $\alpha 4$  in previously solved structures [20,28,39,40,43], which may be attributed to conformational effects caused by the chimeric constructs.



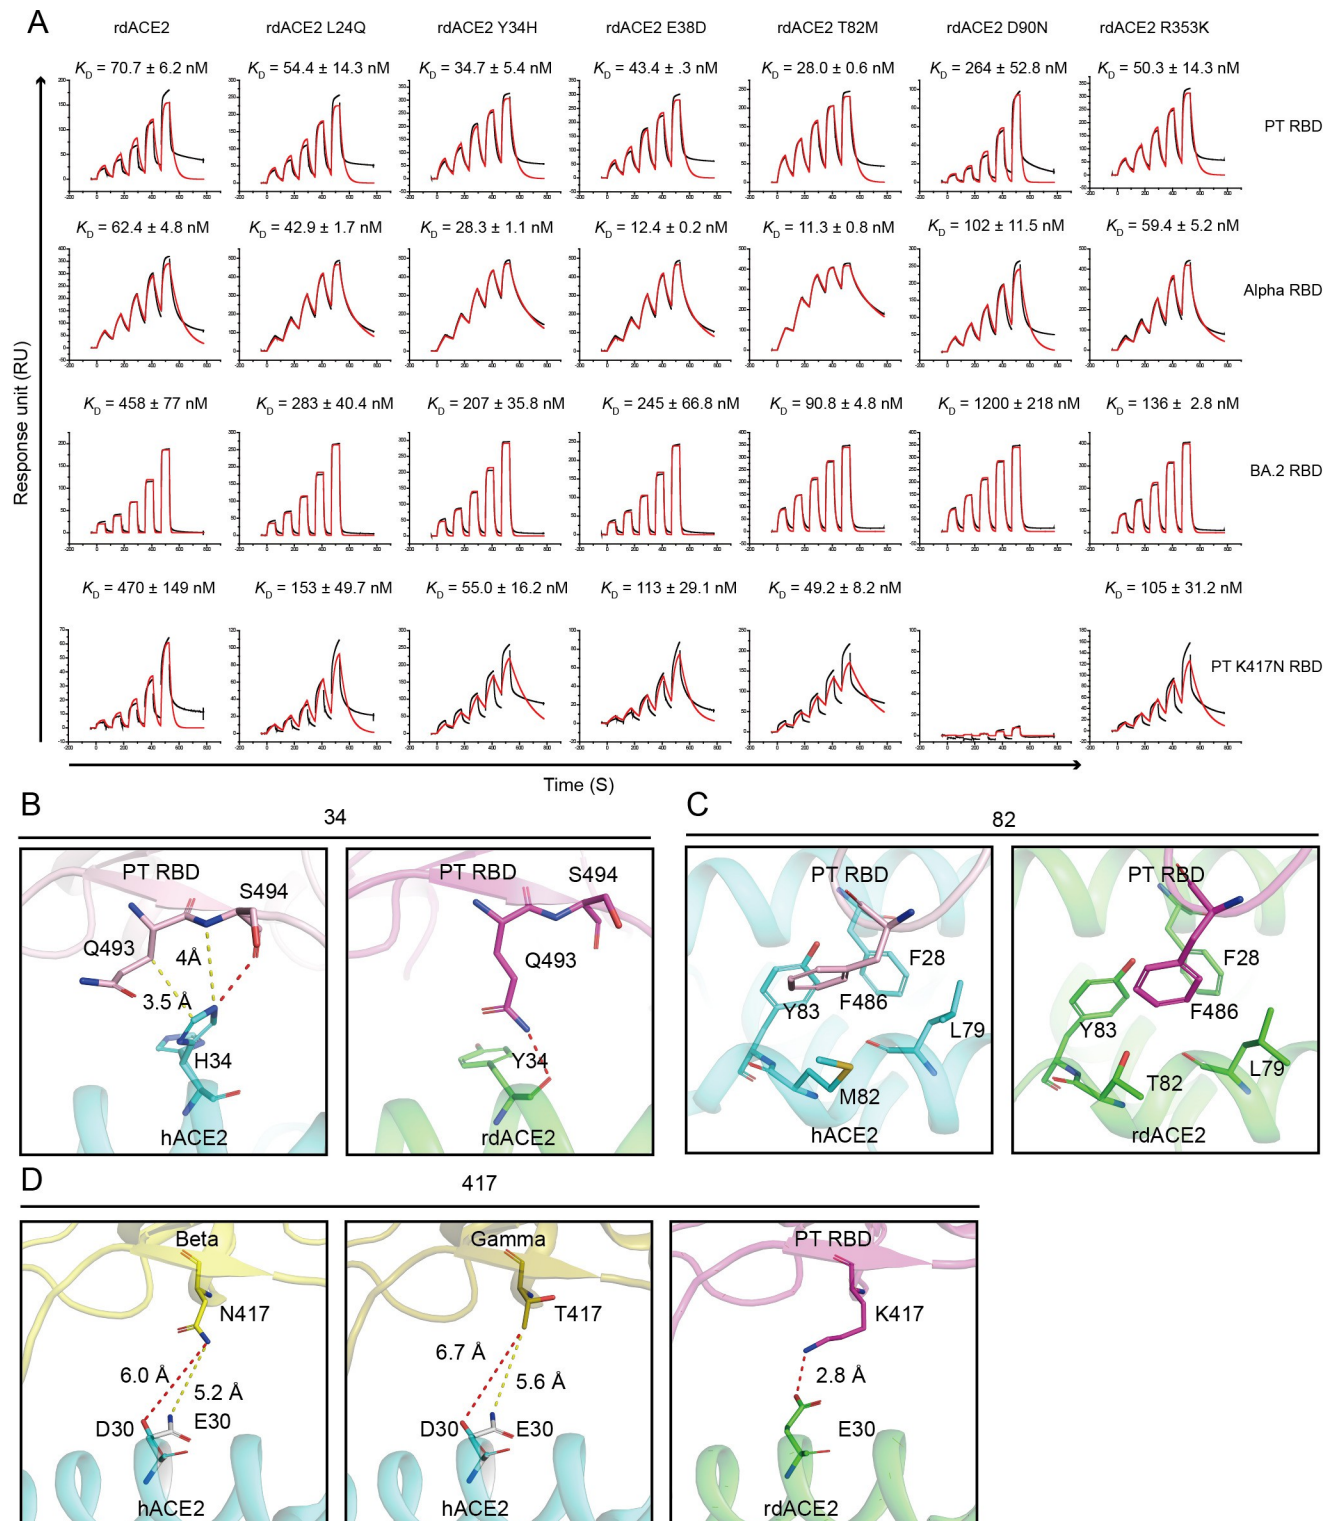

**Fig 5. The critical residues involved in the binding of rdACE2 to SARS-CoV-2 RBDs.** (A) Binding affinities of PT, Alpha, BA.2 and PT K417N RBDs to the different mutants of rdACE2. Raw curves are represented by black lines, and fitted curves are represented by red lines. (B–C) Structural comparison highlighting the designated key ACE2 residues (labeled above) that influence RBD binding, with these residues depicted as sticks. (D) Varying distances of K417/N417/T417 in the RBD to D30 (hACE2) or E30 (rdACE2).

<https://doi.org/10.1371/journal.ppat.1012713.g005>

Some scientists raised the possibility that raccoon dogs could serve as natural hosts for SARS-CoV-2 [33, 34]. However, this finding alone falls short of conclusively establishing raccoon dogs as natural hosts. To date, while 45 species have been documented as naturally infected with SARS-CoV-2, there has been no confirmation of raccoon dogs being naturally infected with or carrying the virus (<https://www.fao.org/animal-health/situation-updates/sars-cov-2-in-animals/en>). Furthermore, investigations during the early stages of the COVID-19 epidemic failed to detect SARS-CoV-2 in raccoon dogs [35]. Thus, there is currently no direct evidence supporting that raccoon dogs are the natural hosts of SARS-CoV-2.

In summary, our data suggests that the binding affinities of rdACE2 to most of the SARS-CoV-2 sub-variants were reduced compared to PT. Additionally, structural analysis identified several key residues crucial for receptor binding. Our result indicated that the susceptibility of raccoon dog is lower than that of some animals with widespread transmission of SARS-CoV-2, such as white-tailed deer and hamster.

## Materials and methods

### Gene synthesis

The PD of the rdACE2 protein (UniProt, B4XEP4) and its mutants with the original signal peptide at the amino-terminal, and a 6×His tag connected to the carboxy-terminal (C-terminal), was designed to generate the deoxyribonucleic acid (DNA) sequence by codon-optimization. Then the DNA sequence was synthesized before being fused to the expression vector pcDNA3.1 [43].

For the S proteins of the SARS-CoV-2 PT and the Alpha variant, the residues 1–1208 were reserved while the transmembrane regions of the C-terminals (residues 1209–1273) were replaced by a trimerization tag (YIPEAPRDGQAYVRKDGWVLLSTFL) followed by a strep tag (SAWSHPQFEK) and a 6×His tag. There were a "GSG" linker in front of the trimerization tag and a single "G" added the end of this tag. There were no linkers between other tags. The sequence was internally modified with the "6P" mutations reported to improve stability [44]. The codon-optimized DNA sequences were synthesized before being fused to the expression vector pCAGGS.

The RBD (corresponding to residues 319–541 of the S protein) of each variant was fused with a signal peptide from interleukin-10 (IL-10) at the amino-terminal, and a 6×His tag at the carboxy-terminal. The codon-optimized DNA sequences were synthesized before being fused to the expression vector pCAGGS, as previously reported [26].

All the genes and subcloned-plasmids mentioned above were produced by GenScript ([www.genscript.com](http://www.genscript.com)).

### Protein expression and purification

HEK293F cells (Gibco, Cat# 11625–019) were cultured at 37°C, 5% CO<sub>2</sub> in SMM 293-TII expression medium (Sino Biological, Cat# M293TII) to express soluble proteins. When the cell density reached 2×10<sup>6</sup> cells/ml, each plasmid and its three times mass of polyethylenimine (PEI) were separately diluted within phosphate buffered saline (PBS) and mixed for 20 minutes before being added to 293F cells, 100 µg plasmid was transfected into 100 ml cells. Five days later, the supernatants were centrifuged and filtered to remove the cell debris, then the His-tagged proteins were captured by the His columns (Cytiva, Cat# 17524802). All purification steps were carried out in a PBS-based buffer. Specifically, the irrelevant host proteins were washed off with the PBS solution containing 20 mM imidazole, while the target proteins were washed off and collected with the PBS solution containing 300 mM imidazole. The purified proteins were further purified by size exclusion chromatography using different types of

molecular sieves, with the HiLoad 16/600 Superdex 200 pg (Cytiva, Cat# 28989335) for S protein and the Superose 6 Increase 10/300 GL (Cytiva, Cat# 29091596) for RBD and ACE2 proteins. The protein samples corresponding to the UV absorption peaks were collected and identified by SDS-PAGE (sodium dodecyl sulfate -polyacrylamide gel electrophoresis).

### SPR assays

All affinity assays were conducted in PBST (0.005% Tween-20 in PBS) and measured by a BIAcore 8K instrument (GE Healthcare) at 25°C. Before the measurements, the rdACE2 protein was immobilized on the CM5 sensor chip (Cytiva, Cat# 29149603) with amine coupling reaction, the target immobilization level 5000 response units (RU), and the actual immobilization levels were 1300–6700 RU. In the preliminary experiment, each RBD variant was diluted to concentrations ranging from 200 nM to 12.5 nM, and a single-cycle experiment was performed. To ensure that the objective values fall within the fitting range, the concentration ranges of the RBDs were adjusted as shown in [S3–S7 Tables](#).

The  $K_D$  values from SPR experiments were obtained using BIAcore 8K evaluation software (GE Healthcare), with a 1:1 Langmuir binding model. Values of single-cycle analysis are the mean  $\pm$  standard deviation (SD) of three independent experiments.

### Pseudovirus infection assay

BHK-21 cells were transfected with the pEGFP-N1-rdACE2s plasmids. After 24 h, the EGFP-positive cells were sorted, reseeded in 96-well plates at  $2 \times 10^4$  cells/well, and cultured for another 24 h. The pseudovirus particles of SARS-CoV-2 PT and its variants were diluted to the same amount, according to the RT-PCR results. Then, 100  $\mu$ L of each pseudovirus was added to the sorted eGFP-positive cells. At 15 h post-transfection, imaging and analysis of fluorescent cells were performed using a CQ1 confocal image cytometer (Yokogawa, Japan). Each group contained three replicates.

### Cryo-sample preparation

Before cryo-EM sampling, all proteins were dialyzed from PBS to buffer A (20mM Tris, 150 mM NaCl, pH 8.0), and adjusted to 2 mg/ml. Then 5  $\mu$ L rdACE2 was added into the equal volume of spike proteins, respectively. The mixtures were placed on ice for 1.5 h. At the same time, the 300 mesh gold grids with 2  $\mu$ m/2  $\mu$ m C-flat films (Quantifoil) were glow-discharged in 15 mA electric current for 30 s using an easiGlow machine (PELCO). After being applied with 4  $\mu$ L protein solution, each grid was frozen in liquid ethane using a Vitrobot device (ThermoFisher Scientific), in which 4°C temperature, 100% humidity, 7 s blot time and –5 blot force was settled for all the samples. The grids were accepted into plastic boxes and stored in liquid nitrogen before use.

### Cryo-EM data collection

The grids were packed and loaded into a 300 kV Titan Krios transmission electron microscope equipped with Gatan K3 camera and matched with the EPU software (ThermoFisher Scientific). All the movies were collected at  $\times 105,000$  magnification with the pixel size of 0.69 Å over a defocus range of –1.0  $\mu$ m to –2.0  $\mu$ m in super-resolution counting mode with a total dose of 60  $e^-/\text{Å}^2$ . Each movie contains 32 frames.

### Cryo-EM data processing

All the movies were processed on the cryoSPARC platform [45]. Generally, by Motion Correction [46] and CTF (contrast transfer function) estimation [47], each micrograph was generated

from a movie, accordingly. The diameter ranges from 80 to 500 Å was set to pick out and extracted the particles, after 5–9 rounds of interactive 2D classification, several particle stacks were selected for Ab-initial Reconstruction to generate 4–8 volumes, followed by the Heterogeneous Refinement [48,49]. And the best volumes were chosen for Non-uniform Refinement, CTF Refinement and DeepEMhancer sharpening [50]. The resolution was determined by the FSC cut-off at 0.143 [51]. To conduct the local refinements, partial maps of ACE2/RBD complexes were extracted from the overall maps utilizing the volume eraser tool in ChimeraX [52]. Subsequently, these partial maps were imported into Cryosparc to generate masks with a dilation radius of "6", a soft padding width of "3", and an appropriate threshold that minimally includes homologous structures. Each local map was produced through two iterations of localized refinements.

For the data set of PT RBD/rdACE2 complex, 17,940 micrographs were generated from the same number of movies, and 2,620,451 particles were extracted from the micrographs. After 2D-classification, 1,452,120 particles were chosen for Ab-initial reconstruction, in which 309,215 particles were sorted out for the refinement of the final volume, and the resolution was calculated to be 2.52 Å. The local refinement was performed to generate the RBD/ACE2-focused map with the resolution of 2.64 Å (S2 Fig).

For the data set of Alpha RBD/rdACE2 complex, 6,307 micrographs were generated from the same number of movies, and 1,299,569 particles were extracted from the micrographs. After 2D-classification, 396,183 particles were chosen for 3D reconstruction, in which 306,176 particles were sorted out for the refinement of the final volume, and the resolution was calculated to be 2.86 Å. The local refinement was performed to generate the RBD/ACE2-focused map with the resolution of 3.16 Å (S3 Fig).

## Structural model building and refinement

The PT RBD/ACE2 structure labeled 6LZG was used as the initial models. After molecular replacement, the structures were fitted to the local refined maps using ChimeraX and COOT [53], the main chains and side chains were adjusted manually. Then the maps together with the structures were processed by real-space refinement from PHINEX [54]. The structural figures were presented by PyMOL (<https://pymol.org/>).

Detailed information for the cryo-EM data set is available in S1 Table.

## Supporting information

**S1 Fig. Structure-based sequence alignment of ACE2 orthologs.** Coils indicate  $\alpha$  helices, black arrows indicate  $\beta$  strands and TT indicates  $\beta$ -turn. Conserved residues are highlighted in red. Sequence alignment is generated with Clustal X and ESPript 3.0.cc.

(PNG)

**S2 Fig. Residues mutated in RBD of SARS-CoV-2 VOCs were summarized.** Residues that differ from the PT RBD are highlighted in different colors to indicate their variations.

(PNG)

**S3 Fig. The purity of the immobilized ligands was assessed using sodium dodecyl sulfate-polyacrylamide gel electrophoresis (SDS-PAGE).**

(TIF)

**S4 Fig. Cryo-EM data processing of the SARS-CoV-2 prototype RBD/rdACE2 complex.**

(A) A representative electron micrograph. (B) 2D classes selected for reconstruction. (C) Main steps of image processing. (D) Angular distribution of the particles. (E) Global and (F) local resolution estimation of the final volumes. (G) Global and (H) local resolution distribution of



the cryo-EM maps, where blue represents for high-resolution areas, and red represents for low-resolution areas.

(PNG)

**S5 Fig. Cryo-EM data processing of the SARS-CoV-2 Alpha RBD/rdACE2 complex.** (A) A representative electron micrograph. (B) 2D classes selected for reconstruction. (C) Main steps of image processing. (D) Angular distribution of the particles. (E) Global and (F) local resolution estimation of the final volumes. (G) Global and (H) local resolution distribution of the cryo-EM maps, where blue represents for high-resolution areas, and red represents for low-resolution areas.

(PNG)

**S6 Fig. The binding affinities of hACE2 to SARS-CoV-2 RBDs of PT, K417N, Alpha and BA.2.** Raw curves are represented by black lines, and fitted curves are represented by red lines.

(TIF)

**S1 Table. Cryo-EM data collection, refinement, and validation statistics.**

(DOCX)

**S2 Table. The amino acid residues of SARS-CoV-2 PT and Alpha variant RBDs interact with rdACE2.**

(DOCX)

**S3 Table. The immobilization and concentrations statistics of SPR assay to test the binding affinities between rdACE2 and RBD.**

(DOCX)

**S4 Table. The immobilization and concentrations statistics of SPR assay to test the binding affinities between ACE2 and PT RBD.**

(DOCX)

**S5 Table. The immobilization and concentrations statistics of SPR assay to test the binding affinities between ACE2 and Alpha RBD.**

(DOCX)

**S6 Table. The immobilization and concentrations statistics of SPR assay to test the binding affinities between ACE2 and BA.2 RBD.**

(DOCX)

**S7 Table. The immobilization and concentrations statistics of SPR assay to test the binding affinities between ACE2 and PT K417N RBD.**

(DOCX)

## Acknowledgments

We thank Y.Q. Mi, H. Feng, and X.X. Bai at the Cryo-EM Center, Shanxi Academy of Advanced Research and Innovation for their technical support on the Cryo-EM. We thank Y. Chen, Z. Yang, B. Zhou (Institute of Biophysics, Chinese Academy of Sciences), and Z. Fan (Institute of Microbiology, Chinese Academy of Sciences) for technical help with SPR experiments.

## Author Contributions

**Conceptualization:** Wen-Xia Tian, George F. Gao.

**Data curation:** Chunliang Luo, Linjie Li, Yuhang Gu, Hangchuan Zhang, Zepeng Xu, Junqing Sun, Kaiyuan Shi.

**Formal analysis:** Kefang Liu.

**Funding acquisition:** Sufang Ma, Kefang Liu.

**Methodology:** Chunliang Luo, Linjie Li, Yuhang Gu, Zepeng Xu.

**Project administration:** Sufang Ma, George F. Gao.

**Resources:** George F. Gao.

**Software:** Linjie Li, Junqing Sun, Kefang Liu.

**Supervision:** Wen-Xia Tian, George F. Gao.

**Validation:** Chunliang Luo.

**Visualization:** Kefang Liu.

**Writing – original draft:** Kefang Liu.

**Writing – review & editing:** George F. Gao.

## References

1. Garbino J, Crespo S, Aubert JD, Rochat T, Ninet B, Deffernez C, et al. A prospective hospital-based study of the clinical impact of non-severe acute respiratory syndrome (Non-SARS)-related human coronavirus infection. *Clin Infect Dis*. 2006; 43(8):1009–15. Epub 2006/09/20. <https://doi.org/10.1086/507898> PMID: 16983613; PubMed Central PMCID: PMC7107919.
2. Perlman S, Netland J. Coronaviruses post-SARS: update on replication and pathogenesis. *Nat Rev Microbiol*. 2009; 7(6):439–50. <https://doi.org/10.1038/nrmicro2147> PMID: 19430490; PubMed Central PMCID: PMC2830095.
3. Fouchier RA, Hartwig NG, Bestebroer TM, Niemeyer B, de Jong JC, Simon JH, et al. A previously undescribed coronavirus associated with respiratory disease in humans. *Proc Natl Acad Sci U S A*. 2004; 101(16):6212–6. <https://doi.org/10.1073/pnas.0400762101> PMID: 15073334; PubMed Central PMCID: PMC395948.
4. van der Hoek L, Pyrc K, Jebbink MF, Vermeulen-Oost W, Berkhout RJ, Wolthers KC, et al. Identification of a new human coronavirus. *Nat Med*. 2004; 10(4):368–73. <https://doi.org/10.1038/nm1024> PMID: 15034574; PubMed Central PMCID: PMC7095789.
5. Woo PC, Lau SK, Chu CM, Chan KH, Tsoi HW, Huang Y, et al. Characterization and complete genome sequence of a novel coronavirus, coronavirus HKU1, from patients with pneumonia. *J Virol*. 2005; 79(2):884–95. Epub 2004/12/23. <https://doi.org/10.1128/JVI.79.2.884-895.2005> PMID: 15613317; PubMed Central PMCID: PMC538593.
6. Zhu N, Zhang D, Wang W, Li X, Yang B, Song J, et al. A novel coronavirus from patients with pneumonia in China, 2019. *N Engl J Med*. 2020; 382(8):727–33. Epub 2020/01/25. <https://doi.org/10.1056/NEJMoa2001017> PMID: 31978945; PubMed Central PMCID: PMC7092803.
7. Zaki AM, van Boheemen S, Bestebroer TM, Osterhaus AD, Fouchier RA. Isolation of a novel coronavirus from a man with pneumonia in Saudi Arabia. *N Engl J Med*. 2012; 367(19):1814–20. <https://doi.org/10.1056/NEJMoa1211721> PMID: 23075143.
8. Ksiazek TG, Erdman D, Goldsmith CS, Zaki SR, Peret T, Emery S, et al. A novel coronavirus associated with severe acute respiratory syndrome. *N Engl J Med*. 2003; 348(20):1953–66. Epub 2003/04/12. <https://doi.org/10.1056/NEJMoa030781> PMID: 12690092.
9. Lednicky JA, Tagliamonte MS, White SK, Elbadry MA, Alam MM, Stephenson CJ, et al. Independent infections of porcine deltacoronavirus among Haitian children. *Nature*. 2021; 600(7887):133–7. <https://doi.org/10.1038/s41586-021-04111-z> PMID: 34789872; PubMed Central PMCID: PMC8636265.
10. Vlasova AN, Diaz A, Damtie D, Xiu L, Toh TH, Lee JS, et al. Novel canine coronavirus isolated from a hospitalized patient with pneumonia in East Malaysia. *Clin Infect Dis*. 2022; 74(3):446–54. <https://doi.org/10.1093/cid/ciab456> PMID: 34013321; PubMed Central PMCID: PMC8194511.
11. Shi Z. From SARS, MERS to COVID-19: A journey to understand bat coronaviruses. *Bull Acad Natl Med*. 2021; 205(7):732–6. Epub 2021/06/03. <https://doi.org/10.1016/j.banm.2021.05.008> PMID: 34075253; PubMed Central PMCID: PMC8162021.

12. Tan CW, Zhu F, Chia WN, Young BE, Yeoh AY, Althaus T, et al. Distinctive serotypes of SARS-related coronaviruses defined by convalescent sera from unvaccinated individuals. *hLife* 2023; 1(1):26–34. <https://doi.org/10.1016/j.hlife.2023.07.002> PMID: 38994526
13. Xu Z, Liu K, Gao GF. Omicron variant of SARS-CoV-2 imposes a new challenge for the global public health. *Biosaf Health*. 2022. <https://doi.org/10.1016/j.bshealth.2022.01.002> PMID: 35072038; PubMed Central PMCID: PMC8767758.
14. Wang L, Gao GF. No novel prevalent mutations detected in the circulating strains of BF.7, BA.5.2, DY, and XBB—China, November 2022 to June 2023. *China CDC Wkly*. 2023; 5(30):672–3. Epub 2023/08/18. <https://doi.org/10.46234/ccdcw2023.126> PMID: 37593125; PubMed Central PMCID: PMC10427496.
15. Du P, Wu C, Hu S, Fan R, Gao GF, Wang Q. The omicron BA.2.86 subvariant as a new serotype of SARS-CoV-2. *Lancet Microbe*. 2024; 5(6):e516. Epub 2024/02/11. [https://doi.org/10.1016/S2666-5247\(23\)00411-1](https://doi.org/10.1016/S2666-5247(23)00411-1) PMID: 38340743.
16. Hu S, Wu C, Wu X, Ma X, Shu C, Chen Q, et al. Classification of five SARS-CoV-2 serotypes based on RBD antigenicities. *Sci Bull (Beijing)*. 2023; 68(23):3003–12. Epub 2023/11/03. <https://doi.org/10.1016/j.scib.2023.09.048> PMID: 37919162.
17. Wu L, Chen Q, Liu K, Wang J, Han P, Zhang Y, et al. Broad host range of SARS-CoV-2 and the molecular basis for SARS-CoV-2 binding to cat ACE2. *Cell Discov*. 2020; 6:68. <https://doi.org/10.1038/s41421-020-00210-9> PMID: 33020722; PubMed Central PMCID: PMC7526519.
18. Li L, Han P, Huang B, Xie Y, Li W, Zhang D, et al. Broader-species receptor binding and structural bases of Omicron SARS-CoV-2 to both mouse and palm-civet ACE2s. *Cell Discov*. 2022; 8(1):65. <https://doi.org/10.1038/s41421-022-00431-0> PMID: 35821014; PubMed Central PMCID: PMC9274624.
19. Gao GF, Wang L. COVID-19 expands its territories from humans to animals. *China CDC Wkly*. 2021; 3(41):855–8. <https://doi.org/10.46234/ccdcw2021.210> PMID: 34703641; PubMed Central PMCID: PMC8521158.
20. Wang Q, Zhang Y, Wu L, Niu S, Song C, Zhang Z, et al. Structural and functional basis of SARS-CoV-2 entry by using human ACE2. *Cell*. 2020; 181(4):894–904 e9. <https://doi.org/10.1016/j.cell.2020.03.045> PMID: 32275855; PubMed Central PMCID: PMC7144619.
21. Xu Z, Kang X, Han P, Du P, Li L, Zheng A, et al. Binding and structural basis of equine ACE2 to RBDs from SARS-CoV, SARS-CoV-2 and related coronaviruses. *Nat Commun*. 2022; 13(1):3547. <https://doi.org/10.1038/s41467-022-31276-6> PMID: 35729237. PubMed Central PMCID: PMC9210341.
22. Shi K, Li L, Luo C, Xu Z, Huang B, Ma S, et al. Structural basis of increased binding affinities of spikes from SARS-CoV-2 Omicron variants to rabbit and hare ACE2s reveals the expanding host tendency. *mBio*. 2024; 15(2):e0298823. Epub 2023/12/19. <https://doi.org/10.1128/mbio.02988-23> PMID: 38112468; PubMed Central PMCID: PMC10870819.
23. Han P, Meng Y, Zhang D, Xu Z, Li Z, Pan X, et al. Structural basis of white-tailed deer, *Odocoileus virginianus*, ACE2 recognizing all the SARS-CoV-2 variants of concern with high affinity. *J Virol*. 2023; 97(9):e0050523. Epub 2023/09/07. <https://doi.org/10.1128/jvi.00505-23> PMID: 37676003; PubMed Central PMCID: PMC10537675.
24. Li S, Yang R, Zhang D, Han P, Xu Z, Chen C, et al. Cross-species recognition and molecular basis of SARS-CoV-2 and SARS-CoV binding to ACE2s of marine animals. *Natl Sci Rev*. 2022; 9(9):nwac122. <https://doi.org/10.1093/nsr/nwac122> PMID: 36187898; PubMed Central PMCID: PMC9517163.
25. Su C, He J, Han P, Bai B, Li D, Cao J, et al. Molecular basis of mink ACE2 binding to SARS-CoV-2 and its mink-derived variants. *J Virol*. 2022; 96(17):e0081422. <https://doi.org/10.1128/jvi.00814-22> PMID: 36000849; PubMed Central PMCID: PMC9472616.
26. Tang L, Zhang D, Han P, Kang X, Zheng A, Xu Z, et al. Structural basis of SARS-CoV-2 and its variants binding to intermediate horseshoe bat ACE2. *Int J Biol Sci*. 2022; 18(12):4658–68. <https://doi.org/10.7150/ijbs.73640> PMID: 35874946; PubMed Central PMCID: PMC9305271.
27. Yang R, Han P, Han P, Li D, Zhao R, Niu S, et al. Molecular basis of hippopotamus ACE2 binding to SARS-CoV-2. *J Virol*. 2024; e0045124. Epub 2024/04/09. <https://doi.org/10.1128/jvi.00451-24> PMID: 38591877.
28. Liu K, Tan S, Niu S, Wang J, Wu L, Sun H, et al. Cross-species recognition of SARS-CoV-2 to bat ACE2. *Proc Natl Acad Sci U S A*. 2021; 118(1). <https://doi.org/10.1073/pnas.2020216118> PMID: 33335073; PubMed Central PMCID: PMC7817217.
29. Chen J, Sun J, Xu Z, Li L, Kang X, Luo C, et al. The binding and structural basis of fox ACE2 to RBDs from different sarbecoviruses. *Virol Sin*. 2024. Epub 2024/06/13. <https://doi.org/10.1016/j.virs.2024.06.004> PMID: 38866203.
30. Li L, Shi K, Gu Y, Xu Z, Shu C, Li D, et al. Spike structures, receptor binding, and immune escape of recently circulating SARS-CoV-2 Omicron BA.2.86, JN.1, EG.5, EG.5.1, and HV.1 sub-variants.

- Structure. 2024; 32(8):1055–67.e6. Epub 2024/07/17. <https://doi.org/10.1016/j.str.2024.06.012> PMID: 39013463.
31. Guan Y, Zheng BJ, He YQ, Liu XL, Zhuang ZX, Cheung CL, et al. Isolation and characterization of viruses related to the SARS coronavirus from animals in southern China. *Science*. 2003; 302(5643):276–8. <https://doi.org/10.1126/science.1087139> PMID: 12958366.
32. Freuling CM, Breithaupt A, Müller T, Sehl J, Balkema-Buschmann A, Rissmann M, et al. Susceptibility of raccoon dogs for experimental SARS-CoV-2 infection. *Emerg Infect Dis*. 2020; 26(12):2982–5. Epub 2020/10/23. <https://doi.org/10.3201/eid2612.203733> PMID: 33089771; PubMed Central PMCID: PMC7706974.
33. Liu WJ, Liu P, Lei W, Jia Z, He X, Shi W, et al. Surveillance of SARS-CoV-2 at the Huanan Seafood Market. *Nature*. 2024; 631(8020):402–8. Epub 2023/04/06. <https://doi.org/10.1038/s41586-023-06043-2> PMID: 37019149.
34. Mallapaty S. COVID-origins study links raccoon dogs to Wuhan market: what scientists think. *Nature*. 2023; 615(7954):771–2. Epub 2023/03/23. <https://doi.org/10.1038/d41586-023-00827-2> PMID: 36944776.
35. Wang W, Tian JH, Chen X, Hu RX, Lin XD, Pei YY, et al. Coronaviruses in wild animals sampled in and around Wuhan at the beginning of COVID-19 emergence. *Virus Evol*. 2022; 8(1):veac046. Epub 2022/07/01. <https://doi.org/10.1093/ve/veac046> PMID: 35769892; PubMed Central PMCID: PMC9214087.
36. Keller M, Peter N, Holicki CM, Schantz AV, Ziegler U, Eiden M, et al. SARS-CoV-2 and West Nile virus prevalence studies in raccoons and raccoon dogs from Germany. *Viruses*. 2022; 14(11). Epub 2022/11/25. <https://doi.org/10.3390/v14112559> PMID: 36423168; PubMed Central PMCID: PMC9698735.
37. Hsueh FC, Shi K, Mendoza A, Bu F, Zhang W, Aihara H, et al. Structural basis for raccoon dog receptor recognition by SARS-CoV-2. *PLoS Pathog*. 2024; 20(5):e1012204. Epub 2024/05/06. <https://doi.org/10.1371/journal.ppat.1012204> PMID: 38709834. PubMed Central PMCID: PMC11098500.
38. Li W, Xu Z, Niu T, Xie Y, Zhao Z, Li D, et al. Key mechanistic features of the trade-off between antibody escape and host cell binding in the SARS-CoV-2 Omicron variant spike proteins. *EMBO J*. 2024; 43(8):1484–98. Epub 2024/03/12. <https://doi.org/10.1038/s44318-024-00062-z> PMID: 38467833; PubMed Central PMCID: PMC11021471.
39. Li L, Liao H, Meng Y, Li W, Han P, Liu K, et al. Structural basis of human ACE2 higher binding affinity to currently circulating Omicron SARS-CoV-2 sub-variants BA.2 and BA.1.1. *Cell*. 2022. <https://doi.org/10.1016/j.cell.2022.06.023> PMID: 35809570. PubMed Central PMCID: PMC9212699.
40. Zhao Z, Xie Y, Bai B, Luo C, Zhou J, Li W, et al. Structural basis for receptor binding and broader interspecies receptor recognition of currently circulating Omicron sub-variants. *Nat Commun*. 2023; 14(1):4405. <https://doi.org/10.1038/s41467-023-39942-z> PMID: 37479708; PubMed Central PMCID: PMC10362042.
41. Han P, Li L, Liu S, Wang Q, Zhang D, Xu Z, et al. Receptor binding and complex structures of human ACE2 to spike RBD from omicron and delta SARS-CoV-2. *Cell*. 2022; 185(4):630–40 e10. <https://doi.org/10.1016/j.cell.2022.01.001> PMID: 35093192; PubMed Central PMCID: PMC8733278.
42. Yue C, Wang P, Tian J, Gao GF, Liu K, Liu WJ. Seeing the T cell immunity of SARS-CoV-2 and SARS-CoV: Believing the epitope-oriented vaccines. *Int J Biol Sci*. 2023; 19(13):4052–60. Epub 2023/09/14. <https://doi.org/10.7150/ijbs.80468> PMID: 37705735; PubMed Central PMCID: PMC10496500.
43. Liu K, Pan X, Li L, Yu F, Zheng A, Du P, et al. Binding and molecular basis of the bat coronavirus RaTG13 virus to ACE2 in humans and other species. *Cell*. 2021; 184(13):3438–51 e10. <https://doi.org/10.1016/j.cell.2021.05.031> PMID: 34139177; PubMed Central PMCID: PMC8142884.
44. Hsieh CL, Goldsmith JA, Schaub JM, DiVenere AM, Kuo HC, Javanmardi K, et al. Structure-based design of prefusion-stabilized SARS-CoV-2 spikes. *Science*. 2020; 369(6510):1501–5. Epub 2020/07/25. <https://doi.org/10.1126/science.abd0826> PMID: 32703906; PubMed Central PMCID: PMC7402631.
45. Punjani A, Rubinstein JL, Fleet DJ, Brubaker MA. cryoSPARC: algorithms for rapid unsupervised cryo-EM structure determination. *Nat Methods*. 2017; 14(3):290–6. <https://doi.org/10.1038/nmeth.4169> PMID: 28165473.
46. Zheng SQ, Palovcak E, Armache JP, Verba KA, Cheng Y, Agard DA. MotionCor2: anisotropic correction of beam-induced motion for improved cryo-electron microscopy. *Nat Methods*. 2017; 14(4):331–2. <https://doi.org/10.1038/nmeth.4193> PMID: 28250466; PubMed Central PMCID: PMC5494038.
47. Rohou A, Grigorieff N. CTFFIND4: Fast and accurate defocus estimation from electron micrographs. *J Struct Biol*. 2015; 192(2):216–21. Epub 2015/08/19. <https://doi.org/10.1016/j.jsb.2015.08.008> PMID: 26278980; PubMed Central PMCID: PMC6760662.
48. Zivanov J, Nakane T, Scheres SHW. Estimation of high-order aberrations and anisotropic magnification from cryo-EM data sets in RELION-3.1. *IUCrJ*. 2020; 7(Pt 2):253–67. Epub 2020/03/10. <https://doi.org/10.1107/S2052252520000081> PMID: 32148853; PubMed Central PMCID: PMC7055373.



49. Punjani A, Zhang H, Fleet DJ. Non-uniform refinement: adaptive regularization improves single-particle cryo-EM reconstruction. *Nat Methods*. 2020; 17(12):1214–21. Epub 2020/12/02. <https://doi.org/10.1038/s41592-020-00990-8> PMID: 33257830.
50. Sanchez-Garcia R, Gomez-Blanco J, Cuervo A, Carazo JM, Sorzano COS, Vargas J. DeepEMhancer: a deep learning solution for cryo-EM volume post-processing. *Commun Biol*. 2021; 4(1):874. <https://doi.org/10.1038/s42003-021-02399-1> PMID: 34267316; PubMed Central PMCID: PMC8282847.
51. Tan YZ, Baldwin PR, Davis JH, Williamson JR, Potter CS, Carragher B, et al. Addressing preferred specimen orientation in single-particle cryo-EM through tilting. *Nat Methods*. 2017; 14(8):793–6. Epub 2017/07/04. <https://doi.org/10.1038/nmeth.4347> PMID: 28671674; PubMed Central PMCID: PMC5533649.
52. Pettersen EF, Goddard TD, Huang CC, Couch GS, Greenblatt DM, Meng EC, et al. UCSF Chimera—a visualization system for exploratory research and analysis. *J Comput Chem*. 2004; 25(13):1605–12. <https://doi.org/10.1002/jcc.20084> PMID: 15264254.
53. Emsley P, Cowtan K. Coot: model-building tools for molecular graphics. *Acta Crystallogr D Biol Crystallogr*. 2004; 60(Pt 12 Pt 1):2126–32. <https://doi.org/10.1107/S0907444904019158> PMID: 15572765.
54. Liebschner D, Afonine PV, Baker ML, Bunkóczi G, Chen VB, Croll TI, et al. Macromolecular structure determination using X-rays, neutrons and electrons: recent developments in Phenix. *Acta Crystallogr D Struct Biol*. 2019; 75(Pt 10):861–77. Epub 2019/10/08. <https://doi.org/10.1107/S2059798319011471> PMID: 31588918; PubMed Central PMCID: PMC6778852.
